# Supplementary material for: Acetone–CO enhancement ratios in the upper troposphere based on 7 years of CARIBIC data: new insights and estimates of regional acetone fluxes
Source: Copernicus journal article supplement (doi:10.5194/acp-17-1985-2017), 2017-02-09
Supplement: Supplementary file 1 [file Acetone_yields.xlsx]

## Sheet: Tabelle1
Acetone yields from monoterpenes and methylbutenol
Supplement to "Acetone-CO enhancement ratios in the upper troposphere based on 7 years of CARIBIC data: New insights and estimates of regional acetone fluxes" by Garlich Fischbeck et al., 2016
Atmospheric Chemistry and Physics (Discussions), doi:10.5194/acp-2016-799
Species	Relative contribution to sum of monoterpenes1)	OH-rate2)	Molar acetone OH-yield	O3-rate2)	Molar acetone O3-yield	Weighted mean molar acetone yield	Reference
α-Pinene	0.34						Vinckier et al. (1998)
			0.11				Aschmann et al. (1998)
					0.07		Ruppert et al. (1999)
					0.07		Reissell et al. (1999)
			0.077				Noziere et al. (1999)
			0.05		0.03		Orlando et al. (2000)
			0.11				Larsen et al. (2000)
							Vanhees et al. (2001)
			0.15				Wisthaler et al. (2001)
			0.156667				Capouet et al. (2004)
			0.08				Librando and Tringali (2005)
			0.063				Lee et al. (2006)
					0.059		Lee et al. (2006b)
					0.12		Tillmann (2007)
		0.384615	0.0995833	0.217391	0.0698	0.0888282
β-Pinene	0.17		0.0725				Aschmann et al. (1998)
					0.04		Ruppert et al. (1999)
					0.045		Reissell et al. (1999)
			0.03				Fanetchi (1999)
			0.02		0.009		Orlando et al. (2000)
			0.11				Larsen et al. (2000)
			0.16				Wisthaler et al. (2001)
			0.065				Jaoui and Kamens (2003)
			0.105				Librando and Tringali (2005)
			0.079				Lee et al. (2006)
					0.036		Lee et al. (2006b)
			0.228333				Kaminski et al. (2014 and 2016)
		0.555556	0.0966481	0.0378788	0.0325	0.0925536
Limonene	0.09		0.03		0.015		Reissell et al. (1999)
			0.004				Lee et al. (2006)
					0.05		Tillmann (2007)
		1.22449	0.017	0.5	0.0325	0.0214941
Δ-3-Carene	0.06		0.145		0.225		Reissell et al. (1999)
			0.15		0.1		Orlando et al. (2000)
			0.15				Larsen et al. (2000)
			0.11				Librando and Tringali (2005)
			0.093				Lee et al. (2006)
					0.095		Lee et al. (2006b)
		0.625	0.1296	0.0909091	0.14	0.130921
Myrcene	0.03				0.29		Ruppert et al. (1999)
			0.43		0.26		Reissell et al. (1999)
			0.36		0.25		Orlando et al. (2000)
					0.21		Reissell et al. (2002)
			0.22				Lee et al. (2006)
					0.23		Lee et al. (2006b)
					0.4		Tillmann (2007)
		1.53846	0.336667	1.2	0.273333	0.308914
Sabinene	0.07		0.195		0.035		Reissell et al. (1999)
			0.09				Larsen et al. (2000)
					0.12		Tillmann (2007)
		0.833333	0.1425	0.208333	0.0775	0.1295
Trans-β-Ocimene	0.23		0.19		0.23		Reissell et al. (1999)
					0.24		Reissell et al. (2002)
					0.15		Gaona-Colman et al. (2016)
		1.81818	0.19	1.36364	0.206667	0.197143
Methylbutenol	0				0.23		Grosjean and Grosjean (1995)
			0.141		0.15		Fantechi et al. (1998)
			0.52				Ferronato et al. (1998)
			0.58		0.12		Alvarado et al. (1999)
			0.67		0.39		Carrasco et al. (2007)
		0.416667	0.47775	0.0245098	0.2225	0.463569
						0.119401	mean molar acetone yield used for the sum of monoterpenes
1) according to Sindelarova et al. (2014)
2) reciprocal of the lifetimes given in Atkinson and Arey (2003), based on Calvert et al. (2000)
