# Supplementary material for: Acetone–CO enhancement ratios in the upper troposphere based on 7 years of CARIBIC data: new insights and estimates of regional acetone fluxes
Source: Copernicus journal article supplement (doi:10.5194/acp-17-1985-2017), 2017-02-09
Supplement: Supplementary file 1 [file acp-17-1985-2017-supplement.zip]

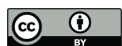

*Supplement of*

## **Acetone–CO enhancement ratios in the upper troposphere based on 7 years of CARIBIC data: new insights and estimates of regional acetone fluxes**

**Garlich Fischbeck et al.**

*Correspondence to:* Marco Neumaier ([marco.neumaier@kit.edu](mailto:marco.neumaier@kit.edu))

- [acp-17-1985-2017-supplement-title-page.pdf](#)
- [Acetone\\_yields.xlsx](#)

The copyright of individual parts of the supplement might differ from the CC-BY 3.0 licence.
